# Supplementary material for: Metabolomic alterations in the plasma of patients with various clinical manifestations of COVID-19
Source: PubMed Central journal article supplement — Virol J. 2024 Oct 28;21:266. doi: 10.1186/s12985-024-02523-7 (PMC11520427; doi:10.1186/s12985-024-02523-7), 2024-10-28

# Supplementary Figure 1

**A**

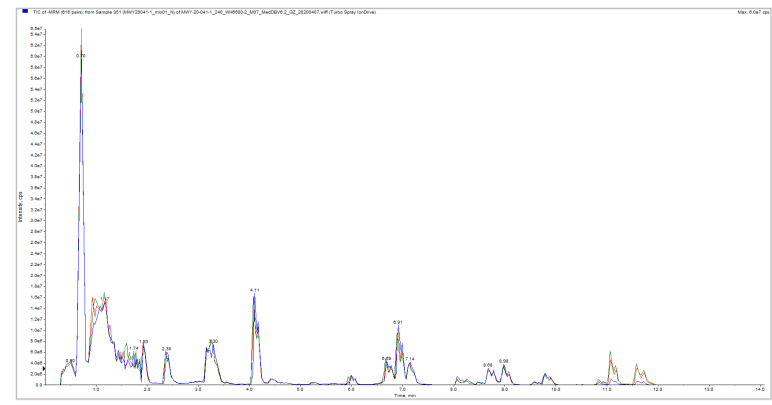

# Supplementary Figure 2

**A**

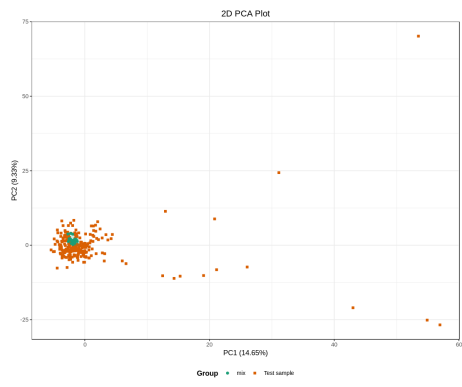

**B**

**COV vs HC**

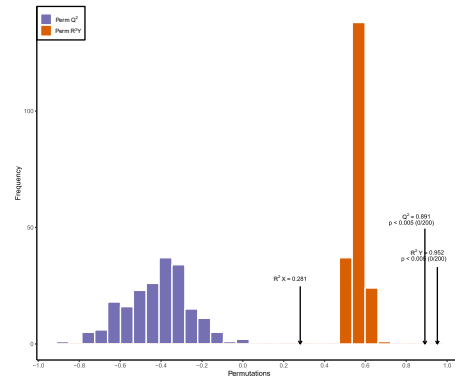

**AS vs HC**

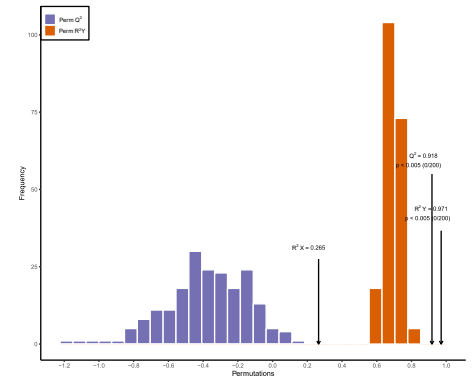

**SM vs AS**

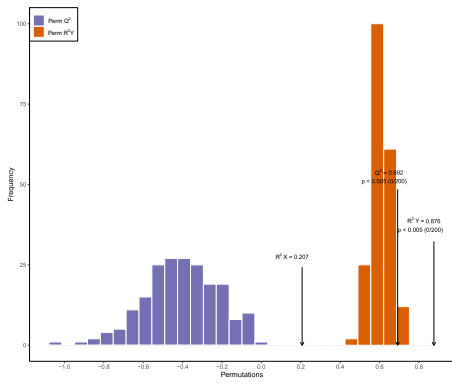

**SD vs MD**

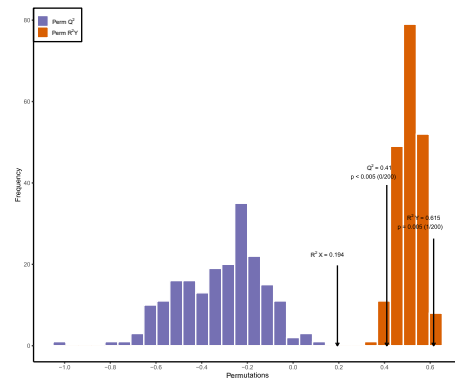

**LTNP vs STNP**

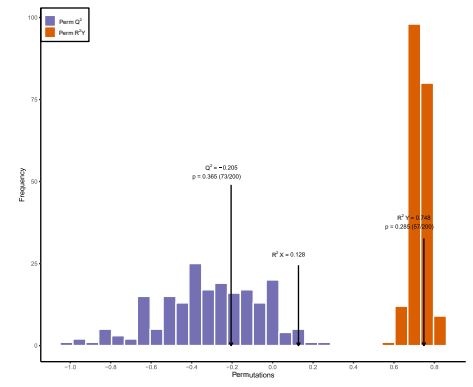

# Supplementary Figure 3

A

## COV vs HC Training

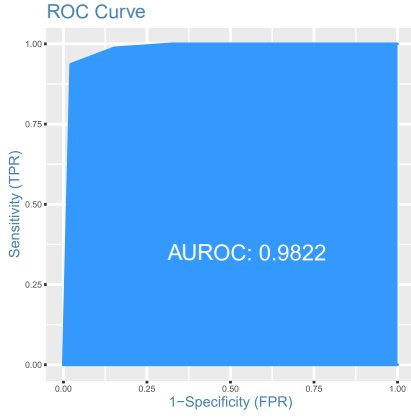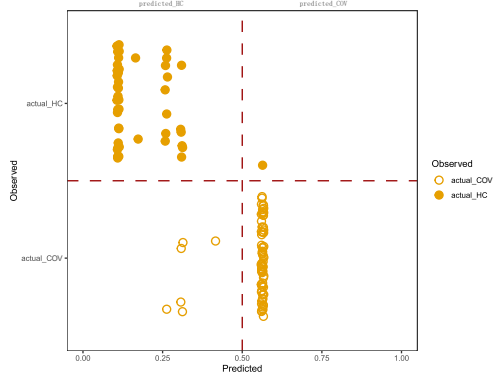

## LTNP vs STNP Training

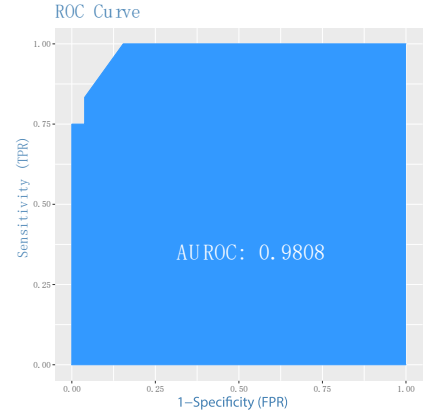

## AS vs HC Training

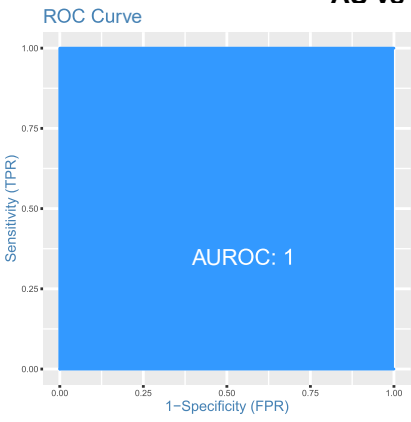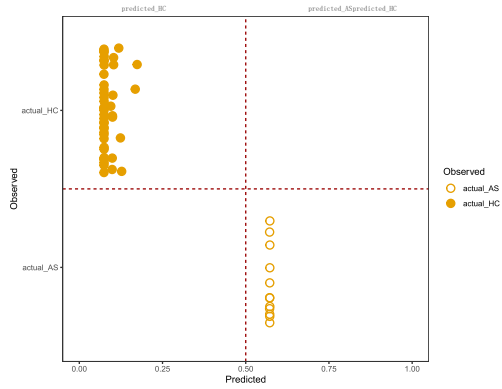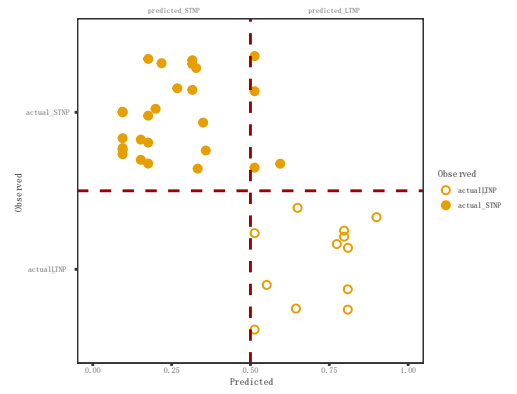

## SM vs AS Training

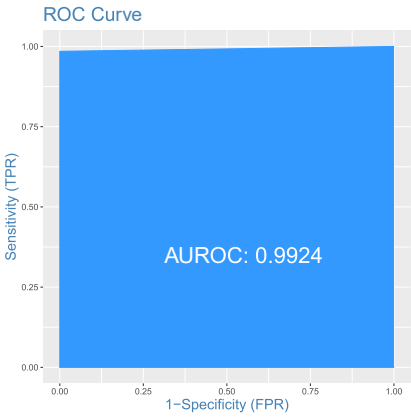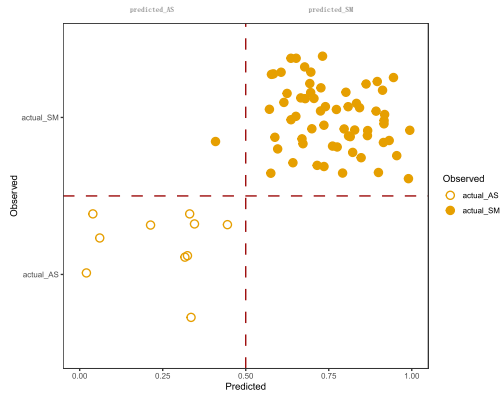

## SD vs MD Training

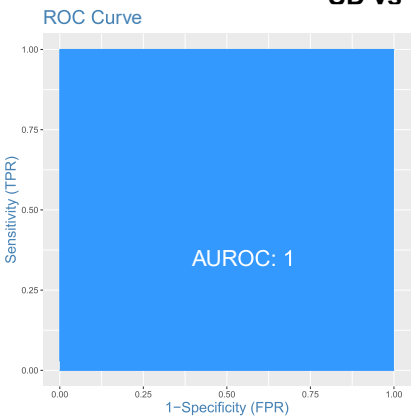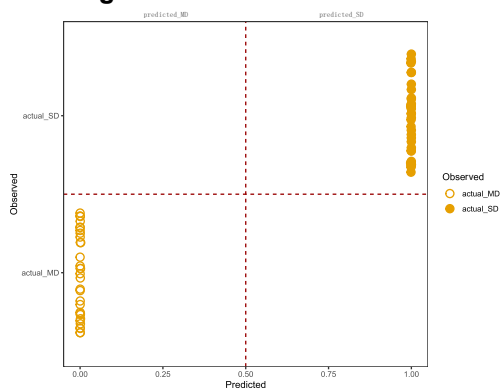

Supplement: 12985_2024_2523_MOESM1_ESM.pdf [file 12985_2024_2523_MOESM1_ESM.pdf]
